# Supplementary material
Source: Springer Nature journal article supplement (https://www.springermedizin.de/resource/supplementary/13052_2013_360_MOESM1_ESM.pdf/9671954)
Supplement: MOESM1 [file 9671954]

**Microbial imbalance**

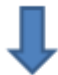

Reduced intraluminal levels of butyrate

Decreased luminal IgA and defensin concentrations

Genetically predisposed defective macrophage phagocytosis

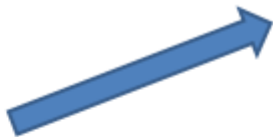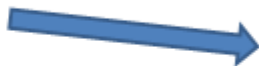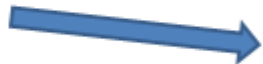

Down-regulation of epithelial tight junction protein expression

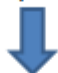

Increased epithelial permeability

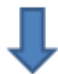

Increased bacterial translocation

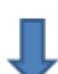

Ineffective bacterial clearance

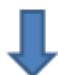

Excessive TLR stimulation

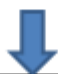

**Pro-inflammatory cytokines and activation of innate and T-cell mediated immune responses**
